# Supplementary material
Source: PubMed Central journal article supplement (PMC3032014)

**Relationship between regional brain volumes and age as well as significance of nonlinearity**

| Brain Regions <sup>(a)</sup> | Control |                   | sMCI |                   | cMCI |                   | AD  |                   | Nonlinearity           |                        |
|------------------------------|---------|-------------------|------|-------------------|------|-------------------|-----|-------------------|------------------------|------------------------|
|                              | eDF     | F <sub>age</sub>  | eDF  | F <sub>age</sub>  | eDF  | F <sub>age</sub>  | eDF | F <sub>age</sub>  | F <sub>nonlinear</sub> | p                      |
| <b>Global Measures</b>       |         |                   |      |                   |      |                   |     |                   |                        |                        |
| Lateral ventricles           | 1.9     | 22.2 <sup>‡</sup> | 2.3  | 45.2 <sup>‡</sup> | 1.3  | 33.5 <sup>‡</sup> | 1.5 | 35.7 <sup>‡</sup> | 7.1                    | 8.0 x 10 <sup>-3</sup> |
| Inferior lateral ventricles  | 1.7     | 25.7 <sup>‡</sup> | 2.2  | 43.1 <sup>‡</sup> | 2.2  | 46.6 <sup>‡</sup> | 2.0 | 29.4 <sup>‡</sup> | 6.9                    | 8.6 x 10 <sup>-3</sup> |
| Total white matter           | 1.7     | 23.5 <sup>‡</sup> | 2.2  | 40.2 <sup>‡</sup> | 1.9  | 18.7 <sup>†</sup> | 2.0 | 18.3 <sup>†</sup> | 5.5                    | 9.2 x 10 <sup>-3</sup> |
| Total gray matter            | 1.8     | 45.9 <sup>‡</sup> | 2.0  | 30.7 <sup>‡</sup> | 1.9  | 9.1 <sup>§</sup>  | 1.2 | 0.6 <sup>ns</sup> | 5.3                    | 1.1 x 10 <sup>-2</sup> |
| Third ventricle              | 1.6     | 47.3 <sup>‡</sup> | 2.0  | 93.0 <sup>‡</sup> | 1.7  | 14.5 <sup>†</sup> | 1.7 | 11.4 <sup>†</sup> | 4.6                    | ns                     |
| Fourth ventricle             | 1.3     | 1.9 <sup>ns</sup> | 1.8  | 5.9 <sup>ns</sup> | 1.5  | 2.6 <sup>ns</sup> | 1.5 | 2.8 <sup>ns</sup> | 2.4                    | ns                     |
| <b>Temporal Lobe</b>         |         |                   |      |                   |      |                   |     |                   |                        |                        |
| Parahippocampal gyrus        | 1.9     | 9.3 <sup>§</sup>  | 1.6  | 18.7 <sup>§</sup> | 1.3  | 2.4 <sup>ns</sup> | 1.4 | 14.4 <sup>†</sup> | 14.9                   | 3.6 x 10 <sup>-5</sup> |
| Fusiform gyrus               | 1.6     | 31.2 <sup>‡</sup> | 1.3  | 17.1 <sup>†</sup> | 1.2  | 16.8 <sup>†</sup> | 1.0 | 2.6 <sup>ns</sup> | 14.1                   | 7.0 x 10 <sup>-4</sup> |
| Hippocampus                  | 1.7     | 44.5 <sup>‡</sup> | 2.4  | 37.8 <sup>‡</sup> | 1.8  | 25.6 <sup>‡</sup> | 2.1 | 27.3 <sup>‡</sup> | 12.2                   | 4.6 x 10 <sup>-5</sup> |
| Transverse temporal GM       | 1.9     | 20.5 <sup>‡</sup> | 2.2  | 9.7 <sup>†</sup>  | 2.0  | 20.7 <sup>‡</sup> | 1.3 | 12.2 <sup>†</sup> | 9.9                    | 1.9 x 10 <sup>-3</sup> |
| Entorhinal cortex            | 1.7     | 5.5 <sup>ns</sup> | 1.4  | 18.8 <sup>†</sup> | 1.3  | 12.9 <sup>†</sup> | 1.4 | 22.6 <sup>‡</sup> | 9.2                    | 1.0 x 10 <sup>-2</sup> |
| Lingual temporal lobe        | 1.2     | 8.0 <sup>ns</sup> | 1.5  | 9.4 <sup>§</sup>  | 1.1  | 0.4 <sup>ns</sup> | 1.1 | 1.8 <sup>ns</sup> | 7.1                    | 1.0 x 10 <sup>-2</sup> |
| Superior temporal GM         | 1.9     | 33.6 <sup>‡</sup> | 1.4  | 9.6 <sup>†</sup>  | 1.9  | 27.0 <sup>‡</sup> | 1.3 | 6.9 <sup>ns</sup> | 4.3                    | ns                     |

|                                  |     |                   |     |                   |     |                    |     |                    |     |                        |
|----------------------------------|-----|-------------------|-----|-------------------|-----|--------------------|-----|--------------------|-----|------------------------|
| <b>Amygdala</b>                  | 1.6 | 47.6 <sup>‡</sup> | 1.9 | 3.2 <sup>ns</sup> | 1.6 | 4.4 <sup>ns</sup>  | 1.7 | 6.8 <sup>ns</sup>  | 3.6 | ns                     |
| <b>Temporal pole</b>             | 0.9 | 0.6 <sup>ns</sup> | 1.3 | 0.8 <sup>ns</sup> | 1.3 | 2.5 <sup>ns</sup>  | 1.3 | 2.5 <sup>ns</sup>  | 3.2 | ns                     |
| <hr/>                            |     |                   |     |                   |     |                    |     |                    |     |                        |
| <b>Posterior Lobe</b>            |     |                   |     |                   |     |                    |     |                    |     |                        |
| <hr/>                            |     |                   |     |                   |     |                    |     |                    |     |                        |
| <b>Paracentral</b>               | 1.3 | 12.5 <sup>†</sup> | 1.4 | 19.5 <sup>†</sup> | 1.1 | 3.8 <sup>ns</sup>  | 1.1 | 8.9 <sup>\$</sup>  | 7.3 | 1.0 x 10 <sup>-2</sup> |
| <b>Postcentral</b>               | 1.3 | 17.5 <sup>†</sup> | 1.4 | 30.3 <sup>‡</sup> | 1.1 | 0.6 <sup>ns</sup>  | 1.1 | 3.4 <sup>\$</sup>  | 7.2 | 1.0 x 10 <sup>-2</sup> |
| <b>Posterior cingulate</b>       | 1.9 | 31.1 <sup>‡</sup> | 1.4 | 13.7 <sup>‡</sup> | 1.9 | 9.4 <sup>†</sup>   | 1.0 | 0.1 <sup>ns</sup>  | 5.8 | ns                     |
| <b>Supramarginal</b>             | 1.6 | 39.2 <sup>‡</sup> | 1.8 | 7.1 <sup>\$</sup> | 1.5 | 0.6 <sup>ns</sup>  | 1.5 | 3.2 <sup>ns</sup>  | 4.6 | ns                     |
| <b>Precuneus</b>                 | 1.7 | 15.1 <sup>†</sup> | 2.2 | 21.5 <sup>‡</sup> | 1.8 | 5.1 <sup>ns</sup>  | 1.9 | 0.7 <sup>ns</sup>  | 4.3 | ns                     |
| <b>Superior parietal</b>         | 1.7 | 30.4 <sup>†</sup> | 2.4 | 13.5 <sup>†</sup> | 2.0 | 1.9 <sup>ns</sup>  | 1.8 | 1.0 <sup>ns</sup>  | 4.0 | ns                     |
| <b>Isthmus cingulate</b>         | 1.0 | 18.4 <sup>†</sup> | 1.2 | 14.3 <sup>†</sup> | 1.0 | 11.1 <sup>\$</sup> | 1.0 | 12.6 <sup>\$</sup> | 2.5 | ns                     |
| <hr/>                            |     |                   |     |                   |     |                    |     |                    |     |                        |
| <b>Frontal Lobe</b>              |     |                   |     |                   |     |                    |     |                    |     |                        |
| <hr/>                            |     |                   |     |                   |     |                    |     |                    |     |                        |
| <b>Precentral GM</b>             | 1.8 | 60.0 <sup>‡</sup> | 2.1 | 50.1 <sup>‡</sup> | 1.8 | 14.6 <sup>‡</sup>  | 1.7 | 10.1 <sup>†</sup>  | 5.7 | ns                     |
| <b>Caudal middle frontal</b>     | 1.6 | 8.7 <sup>\$</sup> | 1.8 | 6.6 <sup>ns</sup> | 1.6 | 5.0 <sup>ns</sup>  | 1.5 | 2.6 <sup>ns</sup>  | 5.3 | ns                     |
| <b>Lateral orbitofrontal GM</b>  | 1.3 | 25.9 <sup>‡</sup> | 1.7 | 82.3 <sup>‡</sup> | 1.4 | 21.7 <sup>‡</sup>  | 1.4 | 13.2 <sup>†</sup>  | 4.9 | ns                     |
| <b>Pars opercularis</b>          | 1.3 | 24.6 <sup>‡</sup> | 1.6 | 8.1 <sup>\$</sup> | 1.3 | 1.8 <sup>ns</sup>  | 1.4 | 8.2 <sup>\$</sup>  | 4.6 | ns                     |
| <b>Medial orbitofrontal GM</b>   | 1.3 | 12.1 <sup>†</sup> | 1.6 | 58.2 <sup>‡</sup> | 1.4 | 13.6 <sup>†</sup>  | 1.4 | 19.3 <sup>†</sup>  | 4.5 | ns                     |
| <b>Rostal orbitofrontal</b>      | 1.9 | 30.6 <sup>‡</sup> | 2.2 | 8.7 <sup>\$</sup> | 2.0 | 12.6 <sup>†</sup>  | 1.5 | 6.5 <sup>\$</sup>  | 4.3 | ns                     |
| <b>Frontal pole</b>              | 1.2 | 12.5 <sup>†</sup> | 1.3 | 3.7 <sup>ns</sup> | 1.0 | 0.2 <sup>ns</sup>  | 1.0 | 5.4 <sup>ns</sup>  | 3.9 | ns                     |
| <b>Rostal anterior cingulate</b> | 1.3 | 1.7 <sup>ns</sup> | 1.2 | 1.4 <sup>ns</sup> | 1.2 | 2.6 <sup>ns</sup>  | 1.3 | 3.5 <sup>ns</sup>  | 2.6 | ns                     |
| <b>Caudal anterior cingulate</b> | 1.3 | 1.3 <sup>ns</sup> | 1.1 | 0.9 <sup>ns</sup> | 1.1 | 1.0 <sup>ns</sup>  | 1.0 | 1.6 <sup>ns</sup>  | 2.5 | ns                     |

|                             |     |                   |     |                    |     |                   |     |                    |     |    |
|-----------------------------|-----|-------------------|-----|--------------------|-----|-------------------|-----|--------------------|-----|----|
| <b>Inferior parietal GM</b> | 1.2 | 48.9 <sup>‡</sup> | 1.6 | 14.6 <sup>†</sup>  | 1.3 | 3.2 <sup>ns</sup> | 1.0 | 2.0 <sup>ns</sup>  | 1.5 | ns |
| <b>Superior frontal GM</b>  | 1.8 | 41.1 <sup>‡</sup> | 1.9 | 22.2 <sup>‡</sup>  | 1.8 | 23.7 <sup>‡</sup> | 1.7 | 11.9 <sup>†</sup>  | 0.9 | ns |
| <hr/>                       |     |                   |     |                    |     |                   |     |                    |     |    |
| <b>Occipital lobe</b>       |     |                   |     |                    |     |                   |     |                    |     |    |
| <hr/>                       |     |                   |     |                    |     |                   |     |                    |     |    |
| <b>Lateral occipital</b>    | 1.3 | 7.3 <sup>ns</sup> | 1.5 | 6.2 <sup>ns</sup>  | 1.4 | 7.2 <sup>ns</sup> | 1.1 | 0.2 <sup>ns</sup>  | 3.8 | ns |
| <b>Cuneus</b>               | 1.2 | 5.4 <sup>ns</sup> | 1.3 | 1.0 <sup>ns</sup>  | 1.0 | 0.1 <sup>ns</sup> | 1.2 | 4.4 <sup>ns</sup>  | 2.6 | ns |
| <hr/>                       |     |                   |     |                    |     |                   |     |                    |     |    |
| <b>Subcortical regions</b>  |     |                   |     |                    |     |                   |     |                    |     |    |
| <hr/>                       |     |                   |     |                    |     |                   |     |                    |     |    |
| <b>Nucleus accumbens</b>    | 1.9 | 17.1 <sup>‡</sup> | 2.3 | 10.7 <sup>†</sup>  | 2.0 | 10.9 <sup>†</sup> | 2.0 | 7.0 <sup>†</sup>   | 5.9 | ns |
| <b>Putamen</b>              | 1.7 | 3.7 <sup>ns</sup> | 2.3 | 4.7 <sup>ns</sup>  | 2.0 | 3.9 <sup>ns</sup> | 1.9 | 1.7 <sup>ns</sup>  | 4.1 | ns |
| <b>Thalamus</b>             | 1.3 | 22.8 <sup>‡</sup> | 1.6 | 40.0 <sup>‡</sup>  | 1.3 | 16.3 <sup>†</sup> | 1.4 | 16.0 <sup>†</sup>  | 3.5 | ns |
| <b>Pallidum</b>             | 1.4 | 4.0 <sup>ns</sup> | 1.9 | 5.4 <sup>ns</sup>  | 1.5 | 4.6 <sup>ns</sup> | 1.9 | 2.5 <sup>ns</sup>  | 3.1 | ns |
| <b>Caudate</b>              | 1.0 | 1.1 <sup>ns</sup> | 1.1 | 10.7 <sup>ns</sup> | 1.0 | 0.9 <sup>ns</sup> | 1.3 | 12.3 <sup>ns</sup> | 2.5 | ns |
| <hr/>                       |     |                   |     |                    |     |                   |     |                    |     |    |

eDF: extra degrees of freedom, an index of nonlinearity where a value larger than unity indicates the deviation from linearity.

F<sub>age</sub>: F-value of age dependence test;

P-value levels of age tests: ns = not significant; \$: p = 0.05; †: p = 0.01; ‡: p = 0.001;

F<sub>nonlinear</sub>: F-value of nonlinearity test;

p<sub>nonlinear</sub> = p-value of nonlinearity test;

GM: Gray matter;

(a) The anatomical correspondence of the regions is shown in the brain map below;

## Brain map illustrating the anatomical region used in the analysis

(Courtesy of Dr. Bruce Fischl, Director Computational

(see map can also be found in: <http://surfer.nmr.mgh.harvard.edu/>)

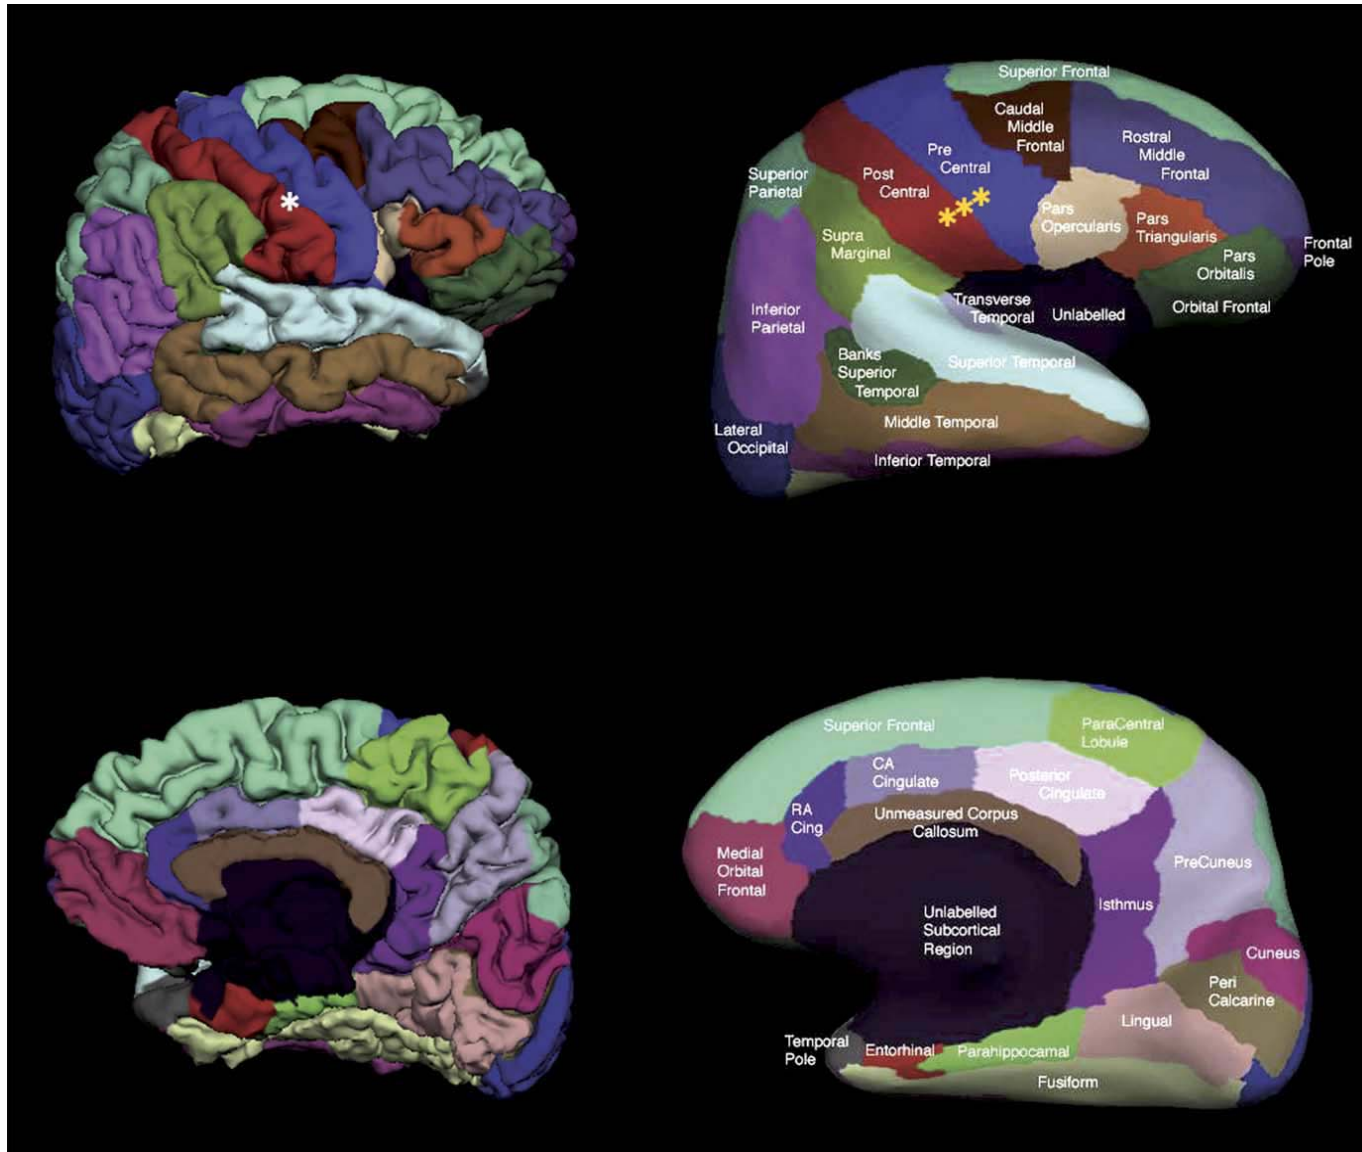

Supplement: NIHMS232513-supplement-01.pdf [file NIHMS232513-supplement-01.pdf]
